# Supplementary material for: Integration Host Factor Binds DNA Holliday Junctions
Source: MDPI journal article supplement (doi:10.3390/ijms24010580), 2022-12-29
Supplement: s1 [file s1]

# Integration Host Factor Binds DNA Holliday Junctions

Shawn H. Lin <sup>1,2</sup>, Dacheng Zhao <sup>1,2</sup>, Vivian Deng <sup>1</sup>, Veronica K. Birdsall <sup>1</sup>, Suzanne Ho <sup>1</sup>, Olga Buzovetsky <sup>1</sup>, Candice M. Etson <sup>1,2</sup> and Ishita Mukerji <sup>1,2\*</sup>

## Supplementary Materials

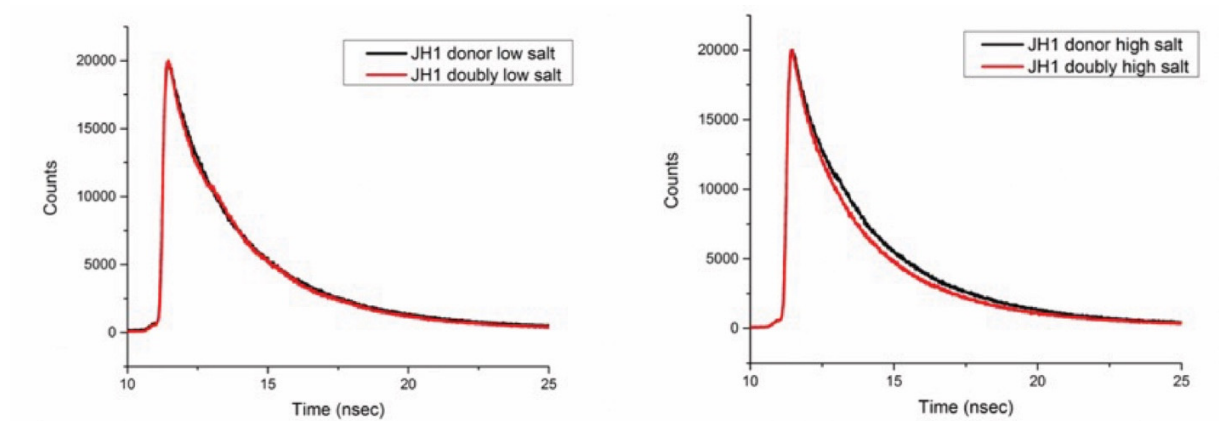

Figure S1: Time-resolved fluorescence decay measurements of the JH1 junction end-labeled with either FAM only (donor) or FAM and TAMRA (doubly). The faster decay of the JH1 doubly-labeled junction in high salt is indicated of a stacked junction. Experimental conditions as described in the Materials and Methods.

Table S1: Time-resolved fluorescence decay parameters JH1 junction

|                                                                                                                                                                                                                                        | DNA                | $\alpha_i$ <sup>1</sup> | $\tau_1$ (ns) | $\alpha_i$ <sup>1</sup> | $\tau_2$ (ns) | $\alpha_i$ <sup>1</sup> | $\tau_3$ (ns) | $\langle \tau \rangle$ <sup>2</sup> (ns) |
|----------------------------------------------------------------------------------------------------------------------------------------------------------------------------------------------------------------------------------------|--------------------|-------------------------|---------------|-------------------------|---------------|-------------------------|---------------|------------------------------------------|
| Low salt                                                                                                                                                                                                                               | JH1 X-FAM          | 0.35                    | 0.627         | 0.51                    | 2.67          | 0.13                    | 5.04          | 2.23                                     |
|                                                                                                                                                                                                                                        | JH1 X-FAM, R-TAMRA | 0.74                    | 1.03          | 0.07                    | 4.31          | 0.18                    | 2.45          | 2.31                                     |
| High salt                                                                                                                                                                                                                              | JH1 X-FAM          | 0.44                    | 0.27          | 0.44                    | 2.37          | 0.11                    | 5.79          | 1.81                                     |
|                                                                                                                                                                                                                                        | JH1 X-FAM, R-TAMRA | 0.46                    | 0.11          | 0.23                    | 1.00          | 0.31                    | 3.72          | 1.43                                     |
| <sup>1</sup> Relative amplitudes are reported, $\alpha_i = \frac{a_i}{\sum_i a_i}$ . <sup>2</sup> $\langle \tau \rangle$ is the intensity-weighted lifetime defined as $\langle \tau \rangle = \frac{\sum_i a_i \tau_i}{\sum_i a_i}$ . |                    |                         |               |                         |               |                         |               |                                          |

Table S1: Decay parameters for the JH1 junction under high (70 mM KCl) and low salt (10 mM KCl) conditions.

| <b>JH1<br/>X-FAM_R-TAMRA<br/>High salt</b> | $\alpha$ | Weighted- $\alpha$ | % of<br>Populations |                                                                 |
|--------------------------------------------|----------|--------------------|---------------------|-----------------------------------------------------------------|
| Component #1                               | 19837    | 0.46               | 69%                 | <b>% <i>Iso II</i><br/>Population<br/>exhibiting<br/>FRET</b>   |
| Component #2                               | 10102    | 0.23               |                     |                                                                 |
| Component #3                               | 13333    | 0.31               | 31%                 | <b>% <i>Iso I</i><br/>Population<br/>exhibiting<br/>No FRET</b> |

Table S2: Population analysis of JH1 junction from decay parameters (Table S1)

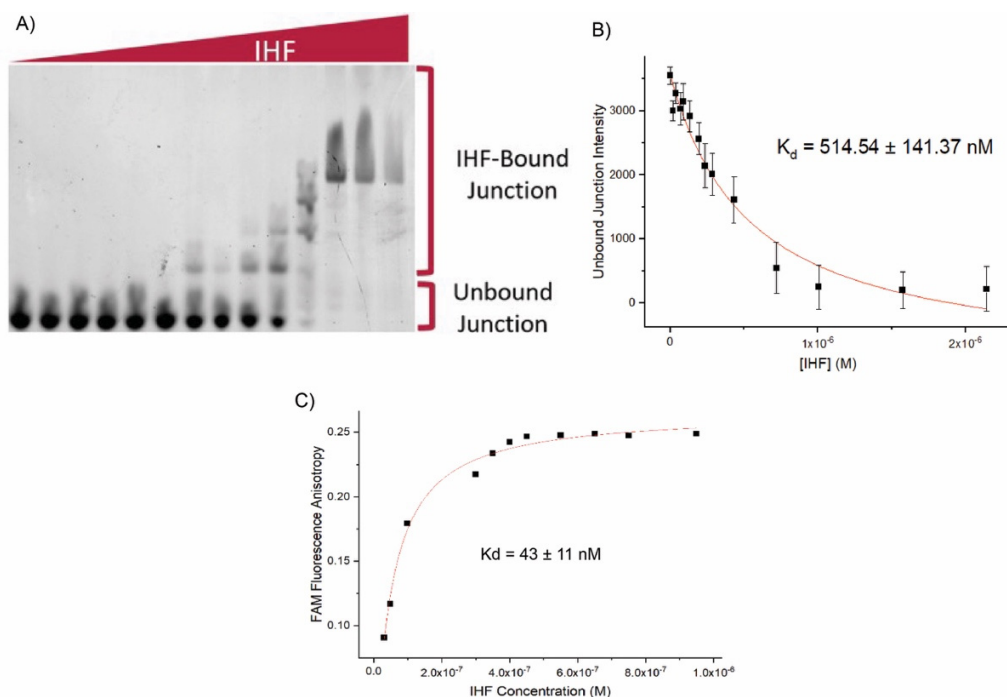

**Figure S2.** A) EMSA of IHF binding to J20 (5 nM) in 1mM  $\text{Mg}^{2+}$ . B) Analysis of free DNA yields a  $K_{D(\text{app})}$  in gel of  $514 \pm 141 \text{ nM}$ . C) Fluorescence anisotropy measurements yield a  $K_D$  of  $43 \pm 11 \text{ nM}$ . Experiments were performed and analyzed as described in the text. As discussed in the main text, the much larger dissociation constant in the gel is potentially attributed to dilution effects in the gel and also because of conformational transitions of the junction that lead to slower migrating species.

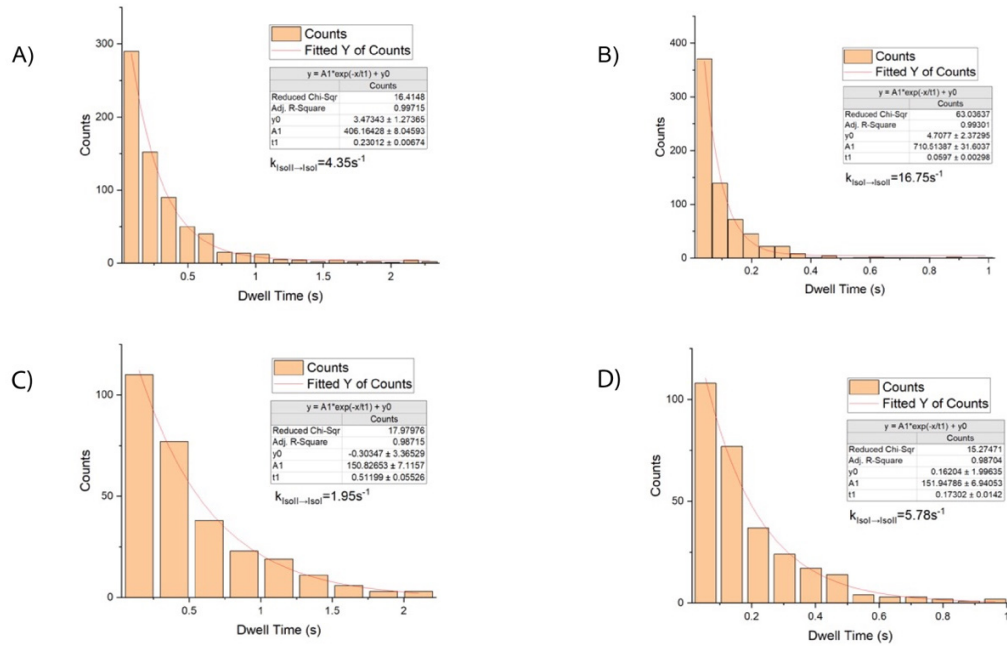

**Figure S3.** Dwell time analysis of XR labeled J20 junctions in 50 mM  $Mg^{2+}$  (A & B) and 10 mM  $Mg^{2+}$  (C & D). A) Dwell time distribution of high FRET (~0.8) or iso II state for XR labeling scheme in 50 mM  $Mg^{2+}$ . B) Dwell time distribution of low FRET (~0.2) or iso I state for XR labeling scheme in 50 mM  $Mg^{2+}$ . C) Dwell time distribution of high FRET (~0.8) or iso II state for XR labeling scheme in 10 mM  $Mg^{2+}$ . D) Dwell time distributions of low FRET (~0.2) or iso I state for XR labeling scheme in 10 mM  $Mg^{2+}$ .

Transitions between the high and low FRET states were identified using the vbFRET algorithm in MATLAB, and the lifetime of each state was extracted from the histogram of dwell times for that state by fitting to a single exponential decay. The transition rate out of each state is the inverse of its lifetime. In both cases, the lifetime of the iso II state was longer than the lifetime of the iso I state, reflecting the dominance of the iso II population in the single molecule FRET efficiency histograms. For both states, the transition rates were slower in the presence of 10 mM  $Mg^{2+}$  than for 50 mM  $Mg^{2+}$ .

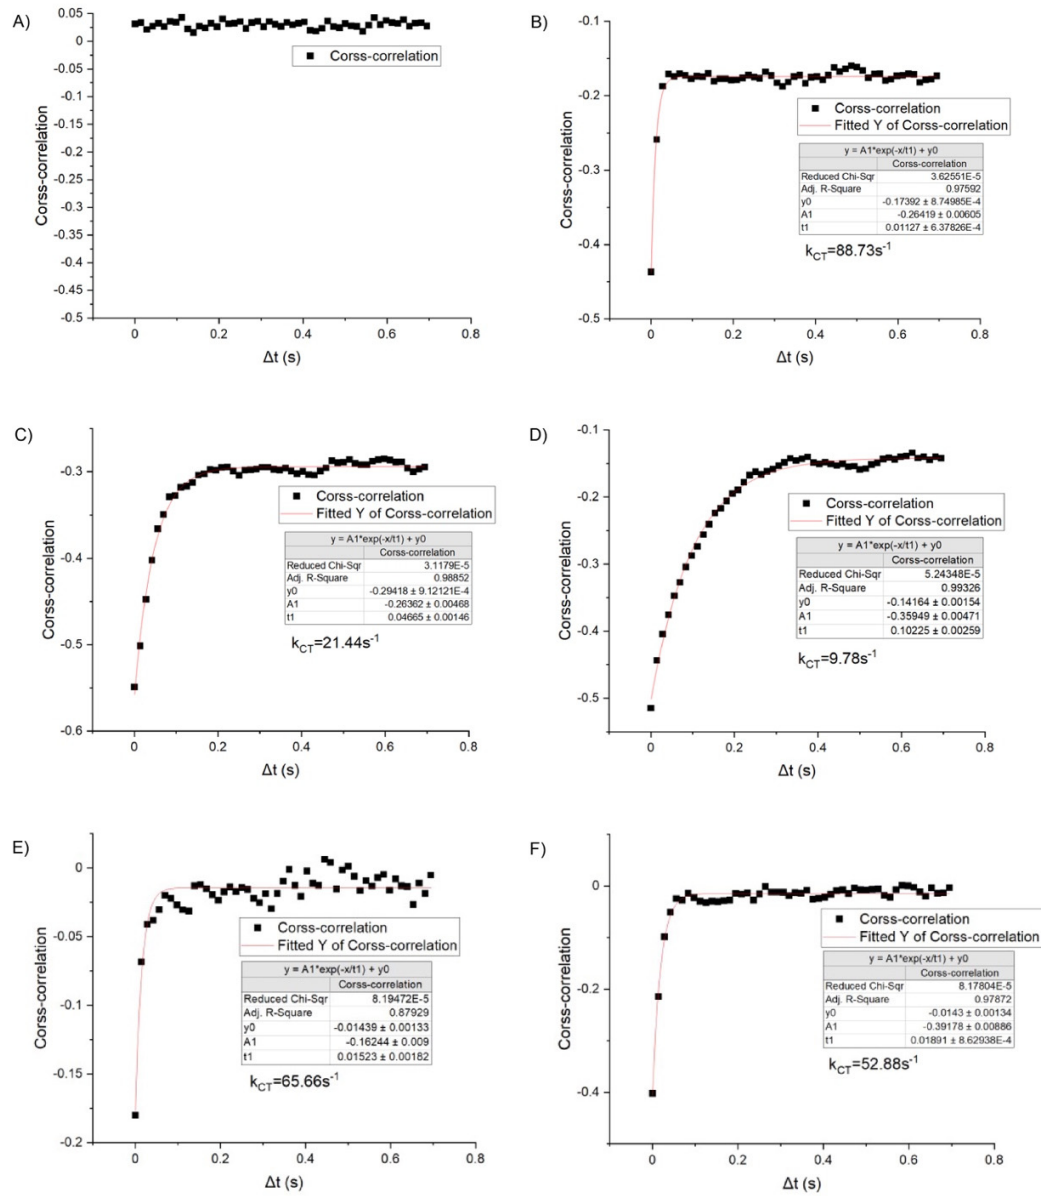

**Figure S4.** Cross correlation analysis of Holliday Junctions in different imaging buffers. All measurements were carried out in the imaging buffer with the following additions: A) 1mM EDTA, B) 1mM  $Mg^{2+}$ , C) 10mM  $Mg^{2+}$ , D) 50mM  $Mg^{2+}$  E) 1 mM  $Mg^{2+}$  with IHF F) 10 mM  $Mg^{2+}$  with IHF. All data were well-described with a single exponential function as shown. The conformer transition rate ( $k_{CT}$ ) was obtained from the lifetime determined from the fit.

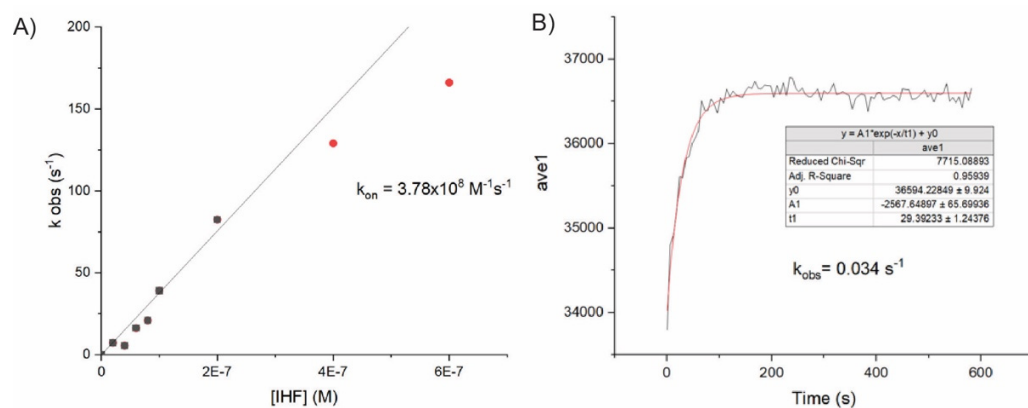

**Figure S5.** Stopped-flow FRET of IHF binding to 34 bp duplex containing the H1 consensus sequence. A) Plot of measured  $k_{\text{obs}}$  as a function of IHF concentration, yielding a  $k_{\text{on}}$  rate of  $3.78 \times 10^8 \text{ M}^{-1} \text{ s}^{-1}$ . DNA concentration was maintained at 10 nM and IHF concentration was increased from 50 nM to 600 nM. Measurements were done with an excess of protein to generate pseudo first order reaction conditions. B): Representative kinetic trace of the binding reaction which is well described by a first-order exponential as shown.
